**Title: Early life trauma leads to violent behavior and its inheritance by impairing local thyroid hormone availability in brain**

**Authors:** Rohit Singh Rawat<sup>1</sup>, Aksheev Bhambri<sup>1,2</sup>, Muneesh Pal<sup>1,2</sup>, Avishek Roy<sup>3</sup>, Suman Jain<sup>3</sup>, Beena Pillai<sup>1,2</sup> and Arpita Konar<sup>1\*</sup>

**Affiliations:**

<sup>1</sup>CSIR-Institute of Genomics & Integrative Biology, New Delhi-110025, India.

<sup>2</sup>Academy of Scientific and Innovative Research (AcSIR), New Delhi, India.

<sup>3</sup>All India Institute of Medical Sciences, New Delhi- India.

\*Correspondence to: arpita.konar@igib.in

## **Abstract**

Violent behavior is an aberrant form of aggression that has detrimental impact on health and society. Early life trauma triggers adulthood violence and criminality, though molecular mechanisms remain elusive. Here, we provide brain region specific transcriptome profiles of peripubertal stress (PPS) exposed adult violent male and resilient female mice. We identify transthyretin (TTR) as a key regulator of PPS induced violent behavior and its intergenerational inheritance. TTR mediated long-term perturbation in hypothalamic thyroid hormone (TH) availability contributed to male violent behavior without affecting circulating hormone. *Ttr* gene ablation in hypothalamus impaired local TH signaling including levels of TH transporters (*Mct8*, *Oatp1c1*), deiodinase 2 (*DIO2*) and TH responsive genes (*Nrgn*, *Trh* and *Hr*). Violent behavior and impaired TTR-TH signaling was also inherited in F1 male progenies. Further, we deciphered *Ttr* promoter hyper methylation in hypothalamus of violent males across generations. Our findings reveal that trauma during puberty trigger lasting violent behavior by epigenetic programming of TTR and consequent impaired local thyroid availability in brain. TTR-TH signaling in hypothalamus can serve as potential target in reversal of violent behavior.

## 1 **Introduction**

2 Violent behavior is a complex personality trait that intersects with several psychopathologies  
3 and can lead to antisocial and criminal activities (1). Every year, more than 1 million people  
4 worldwide die because of assault and many more are victimized of domestic violence and  
5 other forms of physical injuries. Besides afflicting the common mass, violence poses  
6 enormous financial burden for emerging society and is a major challenge to human welfare.  
7 Such global threat to humanity necessitates identification of predisposing factors and early  
8 intervention strategies. Maladaptive form of normal aggression is considered violent, marked  
9 by an inability to conform to social norm. Normal aggression is a behavioral response to  
10 threat and competition, but when expressed out of proportion, control and context including  
11 misjudging age, sex of the opponent loses its social communicative nature. Such uncontrolled  
12 aggression devoid of inhibitory mechanisms can have injurious consequences and referred to  
13 as pathological (2,3). Animal aggression can also be pathological, if there is a response  
14 surpassing species-typical levels; attacks targeted on inappropriate partners, and body parts  
15 prone to serious injury; attacks not signaled by threats; or ignorance of signals of opponents  
16 (4) In general, these criteria resemble human aggressiveness expressed in certain  
17 psychopathologies.

18 The key to combat violent behavior is deciphering the triggers underlying brutal shift of  
19 normal adaptive aggression to pathological form. Mounting epidemiological evidences link  
20 early life traumatic experiences with adult aggression and criminality. A landmark study of  
21 50 violent offenders with history of childhood abuse pioneered the concept that brain is  
22 susceptible to stress during critical periods of early life deteriorating mental health. In  
23 particular, trauma around puberty or adolescence including fear, maltreatment, physical and  
24 sexual abuse confers susceptibility to violence in adult individuals. Moreover, such  
25 behavioral anomalies are not limited parental generations and can be faithfully transmitted to  
26 progenies who have never been exposed to trauma. Although pathological aggression has  
27 emerged as a consequence of early life adversities, biological insights are obscure. Majority  
28 of research in the field of aggressive biology have focused on the adaptive form without  
29 really considering the excessive or inappropriate forms and clinical importance of targeting  
30 violent individuals (5). Essentially, the lacunae in biologically relevant and valid animal  
31 models for pathological aggression are the primary reason for the gap in knowing the  
32 biological roots. Recently, Tzanoulinou et al. (6) developed a novel animal model which  
33 showed the effect of peripubertal fearful exposures on pathological aggression at adulthood.

34 They primarily focused on neural circuits of aggression and on a single gene MAOA in  
35 isolation.

36 Considering multi-factorial etiology of violent behavior, we rationalized that unbiased  
37 genome wide investigation would decipher key molecular pathways that can be exploited  
38 further as prediction and intervention targets. We modeled PPS induced pathological  
39 aggression in laboratory bred Balb/c mice and screened the extreme violent male cohort.  
40 Female mice showed resilience towards trauma induced violent behavior as also reported  
41 previously (7). Next, we performed a sex specific transcriptome analysis in vulnerable brain  
42 regions of hypothalamus and prefrontal cortex (PFC). Hypothalamus is an integral brain  
43 region for expression of both normal and deviant or maladaptive form of aggressive behavior.  
44 Further, neural circuit specific manipulation experiments revealed that ventromedial  
45 hypothalamus is the key region for inter-male aggression (8,9) While hypothalamus is  
46 considered as the trigger centre for aggression, PFC plays opposite regulatory role being  
47 involved in inhibition of threat provoked aggressive behavior. More importantly, direct  
48 neuronal projections from PFC to hypothalamus have been suggested to control both type and  
49 amplitude of aggressive behavior (10,11). Therefore, we primarily focused on hypothalamic  
50 molecular culprits of abnormal violent aggression and also included PFC in our study to  
51 understand inter-brain regional molecular regulation if any.

52 We prioritized Ttr gene given its i) top rank in hypothalamus transcriptome analysis and  
53 unique sex specific diametrically opposite expression pattern in hypothalamus and PFC and  
54 iii) long term gene expression changes from early peripubertal age till adulthood. Next, we  
55 deciphered a molecular mechanism whereby PPS incited sustained TTR deficiency in  
56 hypothalamus resulted in altered levels of other thyroid hormone (TH) transporters (Mct8,  
57 Oatp1c1) and deiodinase (DIO2), reduced local TH availability and modulated expression of  
58 TH regulated genes (Nrgn, Trh) that eventually led to emergence of violent behavior. These  
59 behavioral and molecular deficits were also transmitted to the non-stressed F1 male progenies  
60 of PPS violent F0 males. Further, epigenetic analysis revealed that methylation mark in Ttr  
61 promoter might attribute to such long term programming of behavior.

## 62 **Results**

### 63 *Selection of extreme violent phenotypes*

64 The goal of the experiment was to screen the adult animals exhibiting extreme violent  
65 phenotype in response to PPS exposure. Screening parameters were optimized based on

66 earlier reports (12). We initially observed that in a cohort of N=60 control Balb/c mice 95%  
67 were non-aggressive (Nagg) while 5% showed minimal offensive aggression (Lagg) but  
68 devoid of any pathological signs. Amongst PPS male mice cohort of 60, 78% were hyper-  
69 aggressive (Hagg) with signs of pathological aggression including short attack latency and  
70 attack on females and anesthetized intruder in all the sessions tested, 13% were moderate-  
71 aggressive (Magg) showing signs of pathological form in some days of the RI session and 9%  
72 showed normal offensive aggression across 7 days of 10 min screening sessions. From the  
73 Hagg groups, we selected the extreme violent mice (Vio) that showed greater than 80% of  
74 attack duration and less than minute attack latency (Fig. 1B,1C) in all the session and those  
75 which attacked both females and anaesthetized intruder ( Supplementary Movie S1 to S5). As  
76 reported earlier (7) females did not show pathological aggression.

77 ***Transcriptome analyses identify hypothalamus and PFC specific gene signatures in PPS***  
78 ***adult violent males and resilient females***

79 To discover unbiased molecular correlates of early life trauma induced violence and its sex  
80 differences we used RNA-sequencing to measure all polyA-containing transcripts in  
81 hypothalamus and PFC of control and PPS and male and female mice. Experiment was  
82 performed in 3 independent biological replicates for all the samples and tissues were  
83 collected 24 h after last RI session. Heatmaps of differentially expressed genes (DEG)s were  
84 constructed from the global transcriptome analysis. In hypothalamus, 49 genes were  
85 differentially expressed amongst which 28 were down-regulated, 20 were up-regulated and 1  
86 was expressed in experimental males but not in control males. PFC of violent males showed  
87 87 DEGs amongst which 57 were downregulated, 28 were upregulated and 2 were only  
88 expressed in experimental males but not control males (Fig. 1D, 1E)

89

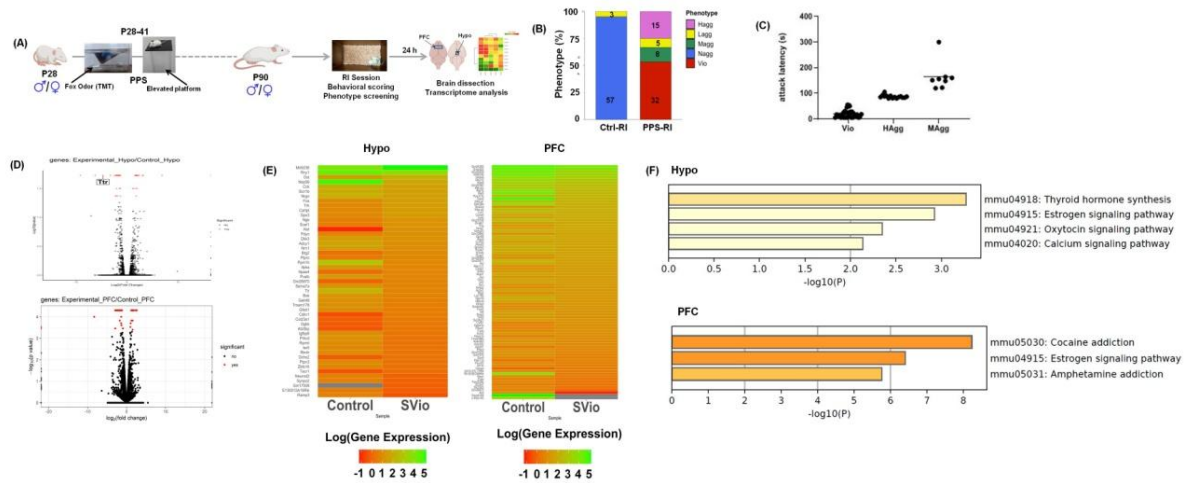

90

91 **Fig. 1. Brain region specific transcriptional responses in peripubertal stress induced**

92 **adult violent males.** (A) Experimental timeline of peripubertal stress (PPS) exposure,

93 resident intruder (RI) behavioural paradigm, brain dissection and transcriptome analysis. (B)

94 (i) Phenotypic behavioral screening post RI scoring in control mice without PPS exposure

95 (Ctrl-RI; N=60) and Experimental mice with PPS exposure (PPS-RI; N=60). Histogram

96 represents non-aggressive (Nagg; N=57) and less aggressive (Lagg; N=3) mice in the Ctrl-RI

97 cohort. PPS-RI cohort comprises of violent (Vio; N=32), hyper-aggressive (Hagg; N=15),

98 moderate-aggressive (Magg; N=8) and less-aggressive (Lagg; N=5) mice (C) Attack latency

99 of Vio, Hagg and Lagg mice of PPS-RI cohort. (D) Volcano plot, (E) heatmap of

100 differentially expressed genes {DEGs; Ctrl-RI (Control) vs PPS-RI Violent (SVio) males} in

101 hypothalamus (Hypo) and prefrontal cortex (PFC) and (F) KEGG gene enrichment analysis

102 in males. RNA sequencing libraries were prepared from three independent biological

103 replicates each of Control and SVio group.

104

105 Resilient females showed more DEGs (hypothalamus-684;PFC-152) than violent males when  
106 compared to their respective control samples (Fig. 2A, 2B) Comparative analysis of male vs  
107 female showed both overlapping and discrete gene signatures. In hypothalamus, 16 DEGs  
108 overlapped between male and female, 12 showing expression changes in opposite direction, 4  
109 in similar direction and 33 genes were exclusive in violent male cohort (Fig. 2D). In PFC, 15  
110 DEGs overlapped between male and female all showing expression changes in similar  
111 direction and 72 genes were exclusive to violent males.

112 In order to identify the gene signatures causal for PPS induced male violent aggression, we  
113 prioritized genes of 2 categories including i) male exclusive DEGs in Hypothalamus and  
114 PFC, ii) DEGs that showed opposite pattern in both sexes. Amongst these DEGs, we selected  
115 top ranking 10 genes from each category and finally 20 DEGs got validated by RT-PCR.

116 Ttr, encoding for thyroid hormone (TH) transporter protein was the topmost ranking gene in  
117 hypothalamus of our transcriptome data (Fig.1D Volcano plot) that was validated by RT-  
118 PCR. Further, it was the only gene showing unique brain region and sex specific  
119 diametrically opposite pattern (Fig 3 and Supplementary Fig S1 B Volcano plot). Gene  
120 ontology enrichment analysis using KEGG tool combined with literature mining also showed  
121 TH signaling as one of the top ranking pathways (1F). TH signaling genes Nrgn and Trh was  
122 amongst the top ranking genes in hypothalamus (Supplementary Fig S1 A Volcano plot) and  
123 showed sex specific opposite pattern in hypothalamus (Fig. 4).

124 Amongst rest of the 17 genes (Supplementary Fig. S2), 14 were male exclusive but altered  
125 either in hypothalamus (downregulated Nrn1, Rtn4r, NeuroD2, Zbtb16, Pvalb; up-regulated  
126 Cartpt, Gm17508, Oxt or PFC (downregulated Gas5; upregulated Cyr61, Gm12840, Dcn,  
127 Man1c1, Sox2ot) but remained unaffected in females (data not shown). 3 genes (Apold btg2,  
128 ddx39b) were upregulated in both hypothalamus and PFC (Fig, S2) but unaltered in females  
129 (data not shown). We, therefore, focused on Ttr and carried out detailed functional analysis  
130 pertaining to TH signaling in our experimental regime.

131

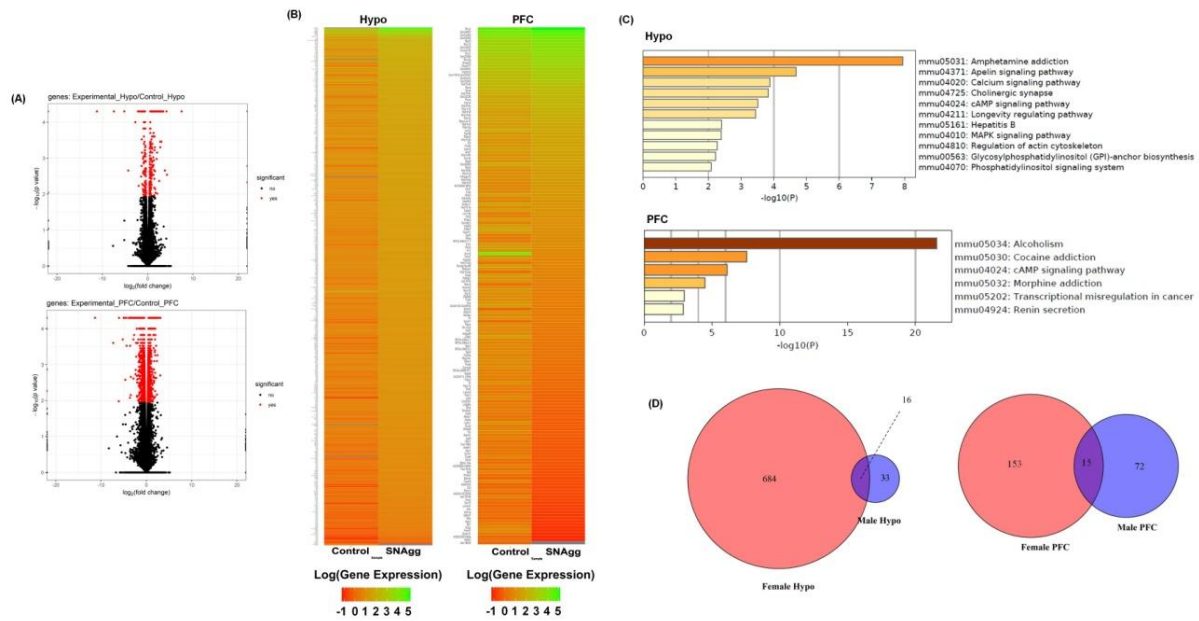

132

133 **Fig. 2. Brain region specific transcriptional responses in peripubertal stress induced**  
 134 **adult resilient females.** (A) (i) Volcano plot, (B) heatmap of differentially expressed genes  
 135 (DEGs; Ctrl-RI (Control) vs PPS-RI Non aggressive (SNAgg) females} in hypothalamus  
 136 (Hypo) and prefrontal cortex (PFC) and (C) KEGG analysis and (D) Venn diagram of Hypo  
 137 and PFC specific overlapping DEGs between SVio males and SNAgg females. RNA  
 138 sequencing libraries were prepared from three independent biological replicates each of  
 139 Control and SNAgg group.

140



141 ***PPS incites persistent changes in Ttr gene expression in both sexes***

142 RT-PCR validation of the transcriptome data revealed unique brain region and sex biased  
143 diametrically opposite expression pattern of the only gene Transthyretin (Ttr) in adult mice  
144 cohort. Ttr was also amongst the topmost DEGs based on fold change and p value (Fig. 1D  
145 volcano plot). In PPS induced adult violent males (SVio), Ttr mRNA showed a decrease of  
146 0.1-fold in hypothalamus and a robust increase of 7-fold in PFC relative to control (Ctrl)  
147 males (Fig. 3B). On the contrary, adult females that did not show violent phenotype  
148 (SNAgg), Ttr mRNA expression pattern was opposite to males, being increased in  
149 hypothalamus (13.9-fold) and drastically reduced (0.5-fold) in PFC relative to control  
150 counterparts (Fig. 3C)

151 In order to understand whether this gene expression changes was persistent from peripubertal  
152 age, we analyzed Ttr mRNA in brain regions post 24h after PPS exposure. The direction of  
153 Ttr mRNA changes was similar at peripuberty in both the brain regions and sexes although  
154 there were minor differences in the extent. PPS caused drastic reduction in hypothalamus  
155 (0.40-fold) and increase in PFC of Ttr mRNA expression (22-fold) of males (Fig. 3D). In  
156 females, the changes were reverse being upregulated (12-fold) in hypothalamus and reduced  
157 (0.31-fold) in PFC of PPS mice relative to unstressed (NS) controls (Fig. 3E)

158 ***TTR protein alters in spatial and cell type specific manner***

159 Immunoblot analysis of TTR protein levels corresponded to its transcript pattern in both the  
160 sexes. TTR protein was reduced to 0.37fold in hypothalamus and upregulated by 1.36- fold in  
161 PFC in PPS induced adult violent males (SVio), relative to control (Ctrl) animals (Fig. 3F).  
162 Until now we were considering the changes in bulk tissue, therefore, we performed  
163 immunofluorescence to elucidate spatial and cell type specificity if any. In SVio males, TTR  
164 protein intensity was significantly reduced in hypothalamus and was exclusive to specialized  
165 glial cells, tanycytes in ventromedial region. In PFC, TTR protein intensity was markedly  
166 increased in the endothelial cells. (Fig. 3G). TTR was found unaffected in choroid plexus  
167 region, referred to as the main site of the protein synthesis (Supplementary Fig. S3). Of note,  
168 TTR showed changes in cells involved in uptake of blood borne substances in the brain  
169 which further intrigued us to check the TTR mediated uptake of thyroxine in the brain  
170 regions.

171

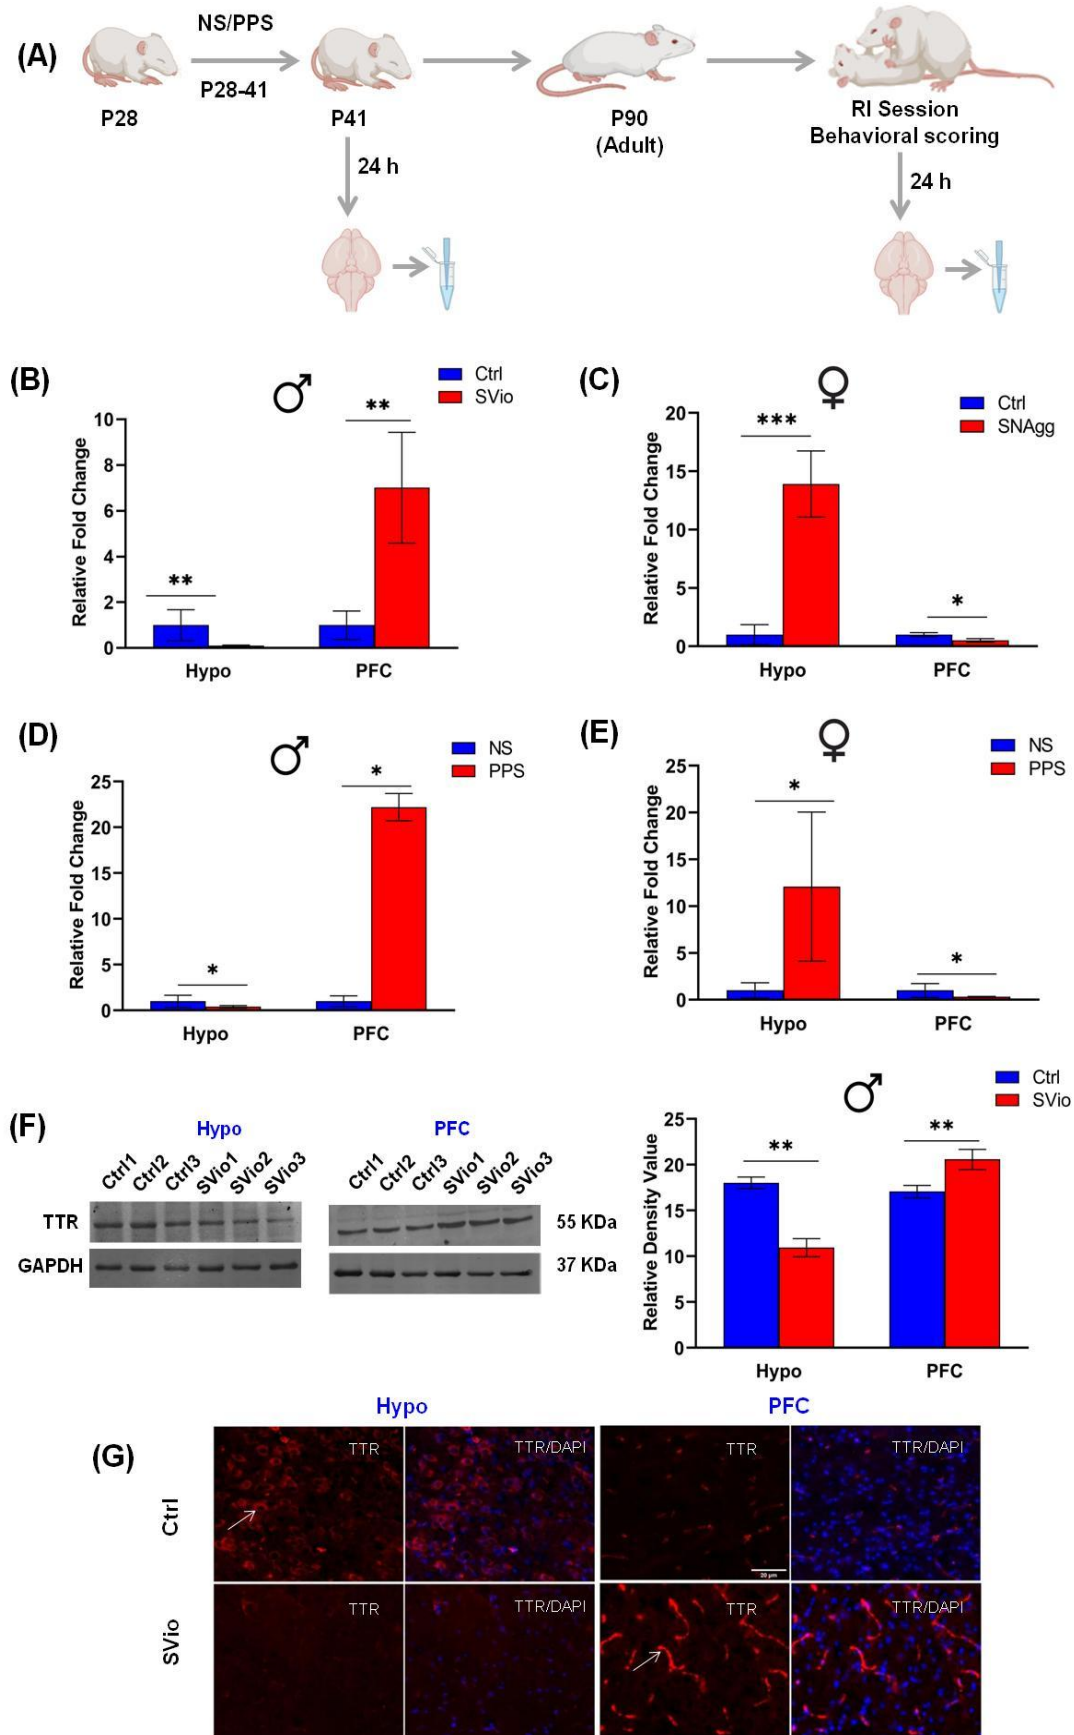

173 **Fig. 3. Peripubertal stress induced long term changes in TTR expression in brain region**  
174 **and sex specific diametrically opposed pattern.** (A) Experimental timeline for transthyretin  
175 (TTR) expression analysis. Ttr mRNA expression profile in Hypo and PFC of peripubertal  
176 stress exposed (PPS) adult (B) male (SVio) and (C) female (SNAgg) mice with control (Ctrl)  
177 counterparts 24 h after RI session (N=9 mice/group). Ttr mRNA expression profile in Hypo  
178 and PFC of peripubertal (D) male and (E) female mice 24 h after stress exposure (PPS) with  
179 control [no stress exposure (NS)] counterparts (N=3 mice/group). Ttr protein expression  
180 profile (F) immunoblot and (G) immunofluorescence analysis in Hypo and PFC of Ctrl and  
181 SVio males (N=3 mice/group). Immunoblot showing three independent biological replicates  
182 of Ctrl and SVio groups. Histogram represents mean of the data (+ SD). Statistical analysis  
183 were performed using unpaired Student's t-test [\* (p< 0.05), \*\* (p< 0.01) and \*\*\* (p< 0.001)]  
184 between NS vs PPS groups, Ctrl vs SVio or Ctrl vs SNAgg.  
185  
186

187 ***TTR perturbation affects long term availability of thyroid hormone in brain with***  
188 ***concomitant changes in transporters, deiodinases and target gene expression***

189 To explore the functional consequences of perturbed TTR expression, we measured  
190 peripheral as well as brain region specific T4 and T3 content in both sexes. Circulating TH  
191 including total T4 (Fig 4B, 4D) and T3 in serum (Fig 4F, 4H) was neither altered in  
192 adulthood nor at peripubertal age in both sexes. Interestingly, brain TH content was  
193 remarkably altered corresponding to TTR gene expression right from peripuberty till  
194 adulthood. In adult violent males (SVio), total T4 and T3 was reduced in hypothalamus but  
195 increased in PFC as compared to control samples (Ctrl) (Fig. 4C, 4G). These changes of  
196 hypothalamic and PFC T4 and T3 content was persistent from early peripubertal (NS vs PPS  
197 males) age (Fig. 4E, 4I). Details of T4 and T3 concentration have been tabulated in  
198 Supplementary Table S2 and S3.

199 Besides TTR, local TH availability in the brain is dependent upon TH transporters and  
200 deiodinase enzymes that determine the intracellular conversion of T4 to T3. Further, TH  
201 mediates its action by regulating expression of target genes. Therefore, we addressed possible  
202 changes in brain local TH signalling by analyzing levels of TH transporters, Mct8 and  
203 Oatp1c1 and deiodinase 2 (Dio2). We also explored TH responsive genes that was  
204 differentially expressed in our transcriptome data (Trh, Nrgn). Both Mct8 and Oatp1c1  
205 transcript levels were reduced in hypothalamus of SVio males to 0.59-fold and 0.80-fold  
206 respectively, but remained unaltered in PFC as compared to Ctrl males (Fig. 4J, 4K). On the  
207 other hand, Dio2 mRNA showed a subtle increase of 1.89-fold in hypothalamus but did not  
208 show significant change in PFC (Fig. 4L). DIO2 enzyme concentration was also increased in  
209 hypothalamus ( Ctrl- 11.1 ng/ml ; Svio- 14.73 ng/ml) but was reduced in PFC of SVio males  
210 (3.96 ng/ml) as compared to Ctrl (11.55 ng/ml) males (Fig.4M).

211 Hypothalamic reduction in T4 and T3 content and consequent impaired TH signaling was  
212 clearly evident from expression of downstream target genes. TH responsive Nrgn mRNA  
213 expression showed significant downregulation of 0.5-fold in SVio males compared to Ctrl  
214 males (Fig. 4O) in hypothalamus similar to Ttr mRNA. NRGN protein level was also reduced  
215 to 0.6-fold in hypothalamus of SVio males (Fig.4P). Uncropped gel images of NRGN  
216 western blot has been included in supplementary Fig. S4 B). Another TH regulated gene, Trh  
217 showed a robust increase of 5-fold in hypothalamus of SVio males while remained unaltered  
218 in PFC (Fig. 4N). Both Nrgn and Trh mRNA levels showed similar expression profile in  
219 early life peripubertal age (Supplementary Fig. S4 A) indicating a long term changes in gene

220 expression. In females, direction of changes was reverse being increased in hypothalamus and  
221 reduced in PFC (Supplementary Fig. S4 C-F). Details of T4 and T3 concentration have been  
222 tabulated in Supplementary Table S4 and S5.

223

224

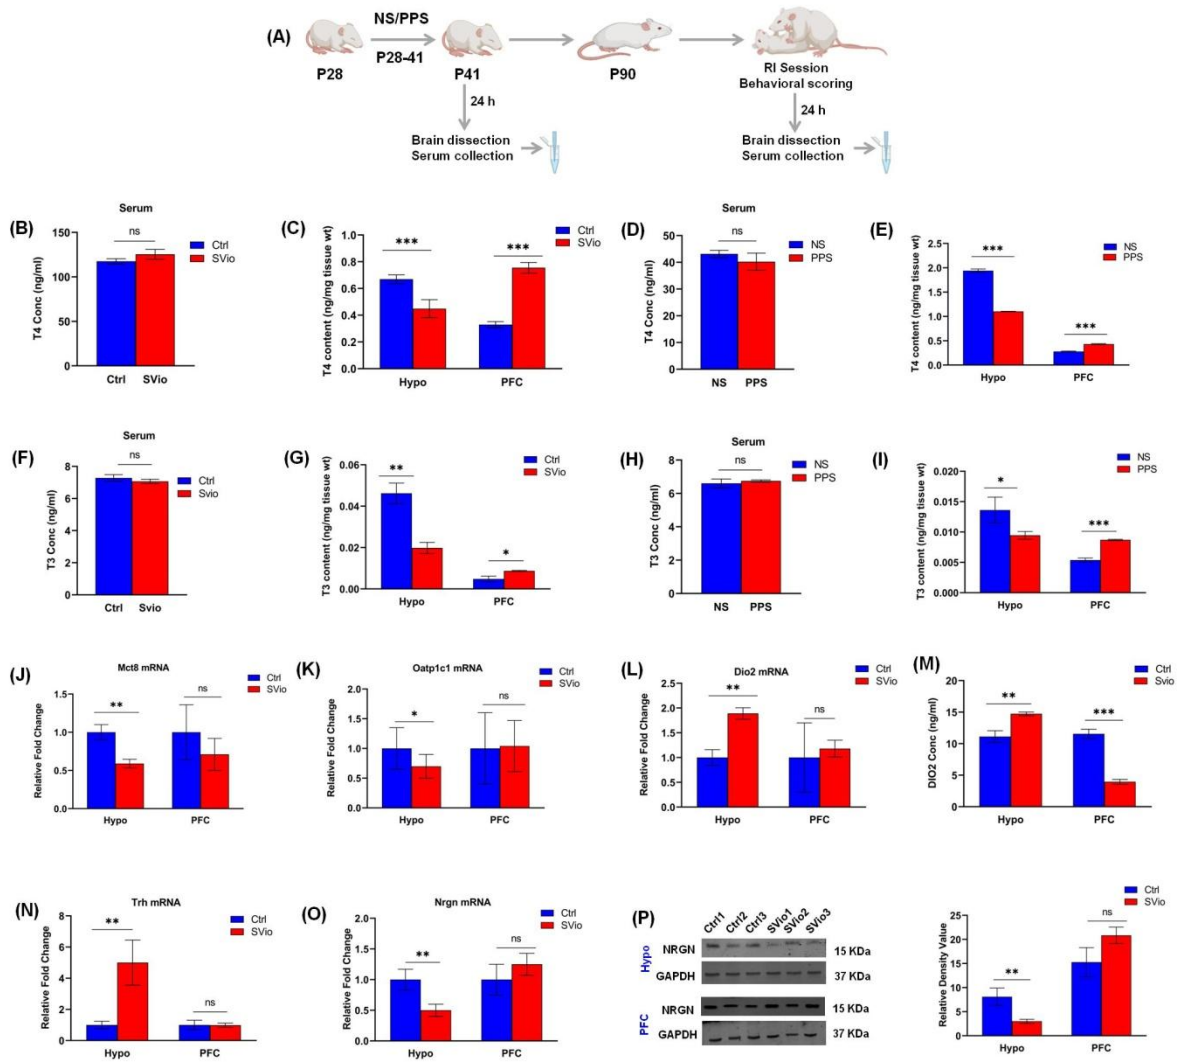

225

226 **Fig. 4. Peripubertal stress induced long term perturbation of thyroid hormone**  
 227 **availability in the brain of violent males with concomitant changes in transporters,**  
 228 **deiodinase and target gene expression.** (A) Experimental timeline. T4 level in (B) serum  
 229 and (C) brain regions (Hypo and PFC) of peripubertal stress (PPS) exposed (SVio) and  
 230 control (Ctrl) adult males 24 h after RI session (N=3 mice/group). T4 level in (D) serum and  
 231 (E) brain regions (Hypo and PFC) of peripubertal males 24 h after stress exposure (PPS) with  
 232 control [no stress exposure (NS)] counterparts (N=3 mice/group). T3 level in (F) serum and  
 233 (G) brain regions (Hypo and PFC) of peripubertal stress (PPS) exposed (SVio) and control  
 234 (Ctrl) adult males 24 h after RI session (N=3 mice/group). T3 level in (H) serum and (I) brain  
 235 regions (Hypo and PFC) of peripubertal males 24 h after stress exposure (PPS) with control  
 236 [no stress exposure (NS)] counterparts (N=3 mice/group). Mct8 mRNA (J), Oatp1c1 mRNA  
 237 (K) and Dio2 mRNA(L) expression profile in Hypo and PFC of Ctrl and SVio males (N=3  
 238 mice/group). DIO2 enzyme (M) concentration in Hypo and PFC of Ctrl and SVio males (N=3

239 mice/group). Trh mRNA (N) and Nrgn mRNA (O) expression profile in Hypo and PFC of  
240 Ctrl and SVio males (N=3 mice/group). NRGN protein expression (P) profile in Hypo and  
241 PFC of Ctrl and SVio males (N=3 mice/group). The immunoblot is showing three  
242 independent biological replicates of Ctrl and SVio groups. Histogram represents mean of the  
243 data (+ SD). Statistical analysis were performed using unpaired Student's t-test [ns (p>  
244 0.05),\* (p< 0.05), \*\* (p< 0.01) and \*\*\* (p< 0.001)] between NS vs PPS groups or Ctrl vs  
245 SVio.

246 ***Drug induced TH manipulation in hypothalamus perturbed local TH signaling and evoked***  
247 ***violent behavior in males without stress exposure***

248 To more directly assess the thyroid hormone manipulation on violent behavior, control males  
249 not subjected to PPS were stereotaxically injected with T3 depleting drug methimazole  
250 (MMI) in hypothalamus and synthetic levothyroxine (LT4) in PFC. Interestingly, intra-  
251 hypothalamic administration of MMI by stereotaxy triggered violent behavioural phenotypes  
252 in adult male mice even without stress exposure (Supplementary Movie S6). Average attack  
253 latency of MMI treated male mice were less than a minute (32 seconds) and spent 34.6% time  
254 of total RI session (average) in clinch attack as compared to 3.8% time (average) of saline  
255 (SA) treated controls (Fig.5B). The extent of behavioral response was similar to that of PPS  
256 exposed adult males (SVio) in earlier experiments (Fig.1). However stereotaxic injection of  
257 LT4 in PFC did not produce any change in behavioral phenotype (Fig. 5C). This implicated  
258 that hypothalamic deficiency in thyroxine could be causal in manifesting violent phenotype  
259 while increase in PFC could be a consequence.

260 Local determinants of TH availability including *Mct8*, *Oatp1c1*, *Dio2* and target genes *Nrgn*  
261 and *Trh* were also affected upon MMI treatment in hypothalamus indicating perturbed TH  
262 signaling. Both *Mct8* and *Oatp1c1* transcript levels were drastically diminished in  
263 hypothalamus of MMI treated males to 0.29-fold and 0.20-fold respectively, as compared to  
264 SA treated control males. On the other hand, *Dio2* mRNA showed increase of 1.86-fold in  
265 MMI hypothalamus as compared to SA treated control males (Fig. 5D). DIO2 enzyme  
266 concentration was also increased in MMI hypothalamus (16.86 ng/ml) as compared to SA  
267 (12.6 ng/ml) males (Fig. 5E). TH target genes *Trh* were upregulated (3.8-fold) and *Nrgn*  
268 mRNA was downregulated (0.8-fold) in hypothalamus of MMI treated animals as compared  
269 to SA treated control counterparts (Fig.5F).



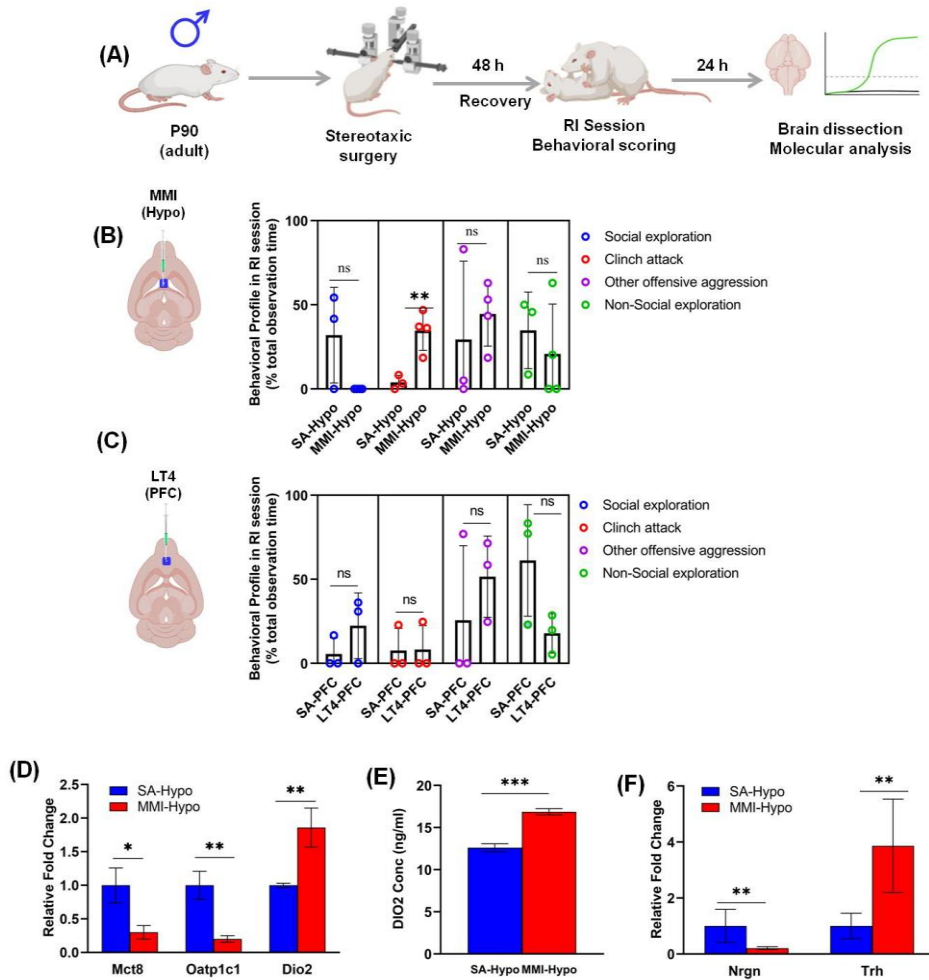

281 **Fig. 5.** Drug impaired local TH signaling in hypothalamus and resulting violent behavior in  
 282 males without stress exposure (A) Experimental timeline of stereotaxic surgeries followed by  
 283 behavioural and molecular experiments. (B) (i) Diagrammatic representation of injection site  
 284 in hypothalamus for methimazole (MMI) and vehicle (Saline-SA) delivery. (ii) Comparative  
 285 analysis of behavioural profile during RI session between SA (N=3) and MMI (N=4)  
 286 administered males. (C) (i) Diagrammatic representation of injection site in prefrontal cortex  
 287 (PFC) for levothyroxine (LT4) and vehicle (Saline-SA) delivery. (ii) Comparative analysis of  
 288 behavioural profile during RI session between SA and LT4 administered males (N=3  
 289 mice/group). (D) Mct8 mRNA, Oatp1c1 mRNA and Dio2 mRNA expression profile in Hypo  
 290 of MMI and SA males (N=3 mice/group). (E) DIO2 enzyme (M) concentration in Hypo of  
 291 MMI and SA males (N=3 mice/group). (F) Trh mRNA and Nrgn mRNA expression analysis  
 292 in Hypo of SA and MMI administered males (N=3 mice/group). Histogram represents mean  
 293 of the data (+ SD). Statistical analysis were performed using unpaired Student's t-test [ns (p >  
 294 0.05), \* (p < 0.05) \*\* (p < 0.01) and \*\*\* (p < 0.001)] between SA vs MMI groups, SA vs LT4  
 295 groups.

296

297 ***Hypothalamus targeted TTR gene ablation impaired TH signaling and induced violent***  
298 ***behavior in males without stress exposure***

299 We checked the direct causal role of TTR by blocking its gene expression through jet-PEI  
300 mediated Ttr esiRNA injection in hypothalamus. Hypothalamus targeted Ttr knockdown to  
301 0.1-fold (90% reduction) in adult unstressed males mirrored the violent behavioural  
302 phenotype induced by PPS. Hypothalamus specific Ttr deficient males showed very short  
303 attack latency of 15 seconds and spent 48% of total behavioural RI session in clinch attack  
304 while none of the scrambled control animals showed signs of attack (Fig. 6B). Such  
305 behavioural profile mirrored the phenotype of PPS exposed violent male (Vio) cohort as  
306 shown in Fig1 and Supplementary Movie S7.

307 Ttr gene silencing dramatically reduced mRNA expression of other transporters Mct8 and  
308 Oatp1c1 to 0.2 and 0.18-fold respectively. Dio2 mRNA showed an increase of 2-fold upon  
309 Ttr gene deficiency in hypothalamus (Fig. 6C). DIO2 enzyme levels showed pronounced  
310 increase from 11.4 ng/ml in scramble treated group to 39.48 ng/ml in Ttr esiRNA treated  
311 group (Fig. 6D).T3 content in hypothalamus was decreased from 0.06 ng/mg tissue wt in  
312 scramble treated group to 0.028 ng/mg tissue wt in Ttr esiRNA treated group (Fig.6E).TH  
313 regulated Trh mRNA was also markedly increased by 6.15-fold and Nrgn mRNA got reduced  
314 to 0.6-fold upon Ttr gene silencing. Here we included another well established TH responsive  
315 gene hairless (Hr) that showed maximal downregulation to 0.1-fold upon Ttr gene silencing  
316 in hypothalamus (Fig.6F).

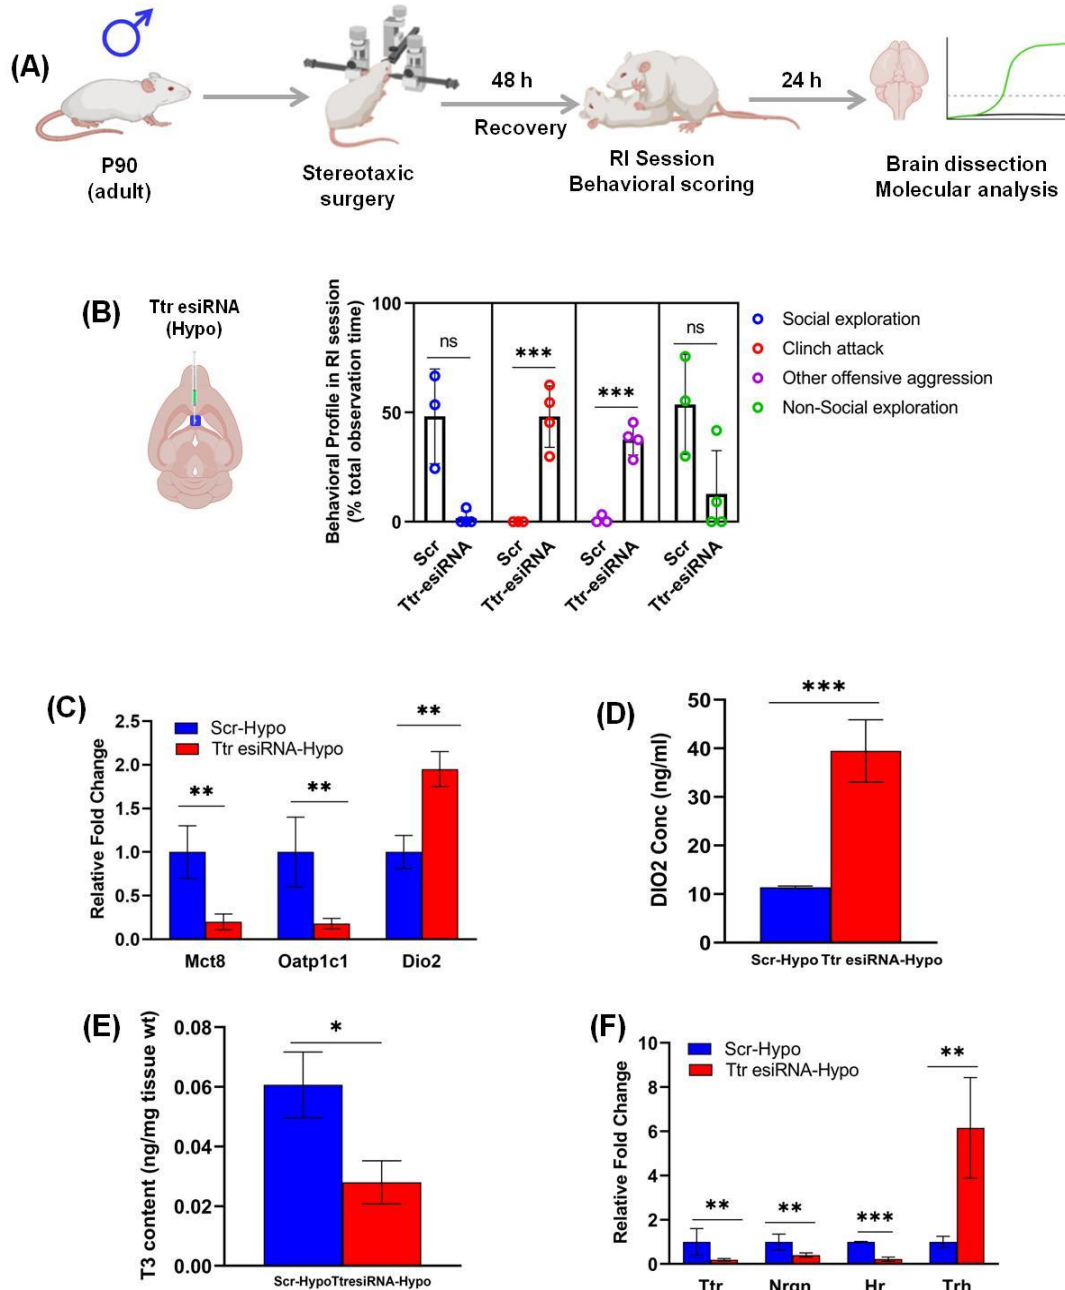

317

318 **Fig.6.** (A) Experimental timeline of stereotaxic surgeries followed by behavioural and  
 319 molecular experiments. (B) (i) Diagrammatic representation of injection site in hypothalamus  
 320 for JetPEI mediated Ttr esiRNA and scrambled siRNA (Scr) delivery. (ii) Comparative  
 321 analysis of behavioural profile during RI session between Ttr esiRNA (N=4) and Scr (N=3)  
 322 administered males. (C) Mct8 mRNA, Oatp1c1 mRNA and Dio2 mRNA expression profile  
 323 in Hypo of Ttr esiRNA and Scr males (N=3 mice/group). (D) DIO2 enzyme concentration in  
 324 Hypo of Ttr esiRNA and Scr males (N=3 mice/group). (E) T3 content in Hypo of Ttr  
 325 esiRNA and Scr males (N=3 mice/group). (F) Ttr mRNA, Nrgn mRNA, Hr mRNA and Trh  
 326 mRNA expression analysis in Hypo of Ttr esiRNA and Scr males (N=3 mice/group).

327 Histogram represents mean of the data (+ SD). Statistical analysis were performed using  
328 unpaired Student's t-test [ns ( $p > 0.05$ ),\* ( $p < 0.05$ ) \*\* ( $p < 0.01$ ) and \*\*\* ( $p < 0.001$ )] between  
329 Scr vs Ttr esiRNA group.

330

331

332

333

334 ***Violent behaviour is inherited in F1 males with impairment in Ttr gene expression and***  
335 ***local TH signaling in hypothalamus***

336 We investigated whether PPS-triggered violent behavioral phenotype of mouse strain Balb/c  
337 is propagated in next generation. Adult violent males that were exposed to PPS paradigm  
338 were mated with non-stressed females to generate the F1 progenies. F1 male and female  
339 progenies were examined at their adulthood. F1 male progenies of F0 violent males showed  
340 similar behavioral phenotype that characterized the parental generation including short attack  
341 latency, attack towards anesthetized and female intruder. F1 male progenies of F0 violent  
342 males spent 45% of RI observation time in clinch attack with extremely short attack latency  
343 of 11 seconds while males from control F0 did not exhibit attack (Fig.7B, 7C).However,  
344 female siblings of F1 males did not display any prominent sign of aggression.  
345 (Supplementary Movie S8 and S9).

346 Next, we checked whether molecular changes in parental generation (F0 violent father)  
347 including impaired Ttr gene expression and local TH signaling in brain were also perpetuated  
348 in the next generation. Similar to F0 violent father, F1 males showed deficiency in  
349 hypothalamic T3 content while that of PFC was not altered (Fig.7E). DIO2 enzyme levels  
350 also increased in hypothalamus but remained unchanged in PFC (Fig.7D). Ttr expression  
351 reduced to 0.35-fold in the hypothalamus of F1 violent males without any significant change  
352 in the PFC. Nrgn (reduction to 0.35-fold) and Trh (upregulation by 4.3-fold) were also altered  
353 similarly in hypothalamus (Fig.7F)

354

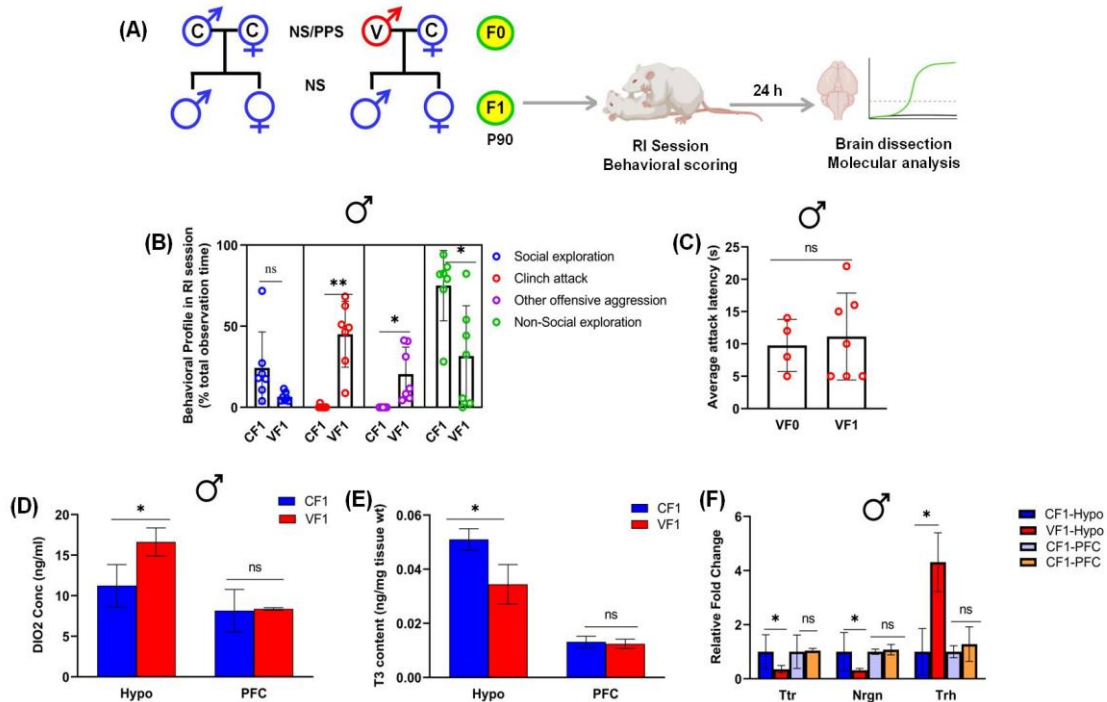

355

356 **Fig.7. Intergenerational inheritance of PPS induced violent behaviour with concomitant**  
 357 **changes in Ttr and thyroid hormone signaling.** (A) Breeding pairs and experimental  
 358 timeline. (B) Comparative analysis of behavioural profile during RI session between F1  
 359 progenies of control male crossed with control female (CF1) and F1 progenies of peripubertal  
 360 stress exposed violent males crossed with control female (VF1) administered males (N=7  
 361 mice/group). (C) Attack latency comparison between parent violent male (VF0) and violent  
 362 F1 male (VF1). (D) DIO2 enzyme concentration in Hypo and PFC of CF1 and VF1 males  
 363 (N=3 mice/group). (E) T3 content in Hypo and PFC of CF1 and VF1 males (N=3  
 364 mice/group). (F) Ttr, Nrgn and Trh mRNA expression analysis in Hypo and PFC and of CF1  
 365 and VF1 males (N=3 mice/group). Histogram represents mean of the data (+ SD). Statistical  
 366 analysis were performed using unpaired Student's t-test [ns ( $p > 0.05$ ), \* ( $p < 0.05$ ) and \*\* ( $p <$   
 367  $0.01$ )] between CF1 and VF1 groups or VF0 vs VF1.

368 ***PPS elicits long lasting change in Ttr DNA methylation in the brain of violent males***

369 Next, we examined whether epigenetic regulation of Ttr could explain the sustained  
370 molecular and behavioral changes invoked by PPS exposure. To address this question, we  
371 analyzed DNA methylation state of Ttr proximal promoter in the PFC and hypothalamus of  
372 male mice. As anticipated, MedIP PCR demonstrated that peripubertal traumatic experiences  
373 trigger changes in Ttr DNA methylation within the PFC and hypothalamus in adulthood and  
374 even inherited in next generation. Ttr promoter showed brain region specific differential  
375 methylation state in opposite direction to that of its expression pattern. Hypermethylation was  
376 induced in hypothalamus (11-fold) where as hypomethylation (0.27-fold) was evident in PFC  
377 of adult violent males relative to control. Hypermethylation in hypothalamus even persisted  
378 in the brain of F1 males (5.66-fold) as compared to controls. In an independent study on  
379 DNA methylome of violent male cohort (data not shown), we found Ttr as one of the topmost  
380 differentially methylated gene. As animals used for behavioral experiments were same as  
381 those for epigenetic studies, we inferred that Ttr promoter methylation could serve as a  
382 predictor of early life trauma induced gene expression and behavioral deficits (Fig. 7)

383

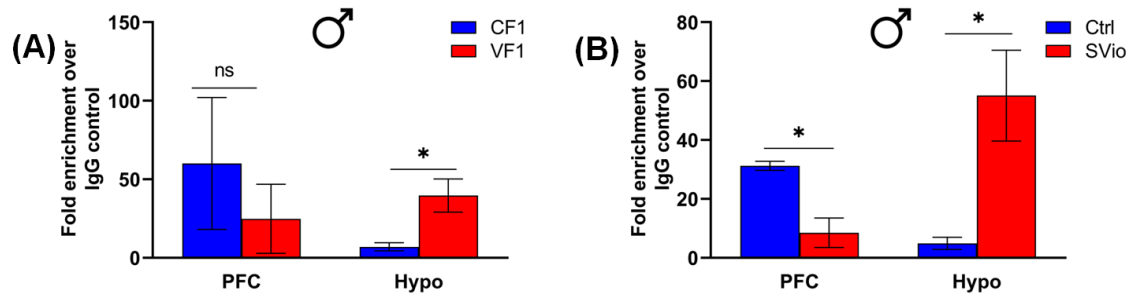

384

385 **Fig. 8. Ttr promoter methylation changes in F0 violent males perpetuated in F1**  
386 **generation.** Methylated DNA immunoprecipitation analysis showing 5-methylcytosine fold  
387 enrichment in Ttr promoter in PFC and Hypo of (i) Ctrl and SVio males (F0) (ii) CF1 and  
388 VF1 (N=3 mice/group). Statistical analysis were performed using unpaired Student's t-test  
389 [ns ( $p > 0.05$ ) and \* ( $p < 0.05$ )] between Ctrl and SVio or CF1 and VF1 males.



## 390 **Discussion**

391 In the present study, we fill in the existent gap of knowledge about the molecular roots of  
392 violent behavior. Based on unbiased transcriptome screening, we identify novel role of TTR  
393 in long-term programming of violent aggression induced by PPS. More importantly, we show  
394 that TTR regulated thyroid hormone availability in hypothalamus contributes to abnormal  
395 behavioral response.

396 TTR is a 55 kDa protein that is involved in the uptake of T4 from blood to CSF and local  
397 distribution of the hormone in brain (13). TTR has also been assigned other functions  
398 including proteolysis of Neuropeptide Y (14), neuroprotection and regeneration of damaged  
399 neurons (15). However, we focused on TH based on multiple reasons. Our transcriptome data  
400 showed significant expression change in TH genes primarily Trh and Nrgn in hypothalamus.  
401 Several other genes in our list (PFC-Rasd2, Fosl2, Nr4a3, Inf2, Arl4d, Dcn, Pcp4l1, Drd2,  
402 Syndig11, Hspa1a, Spock3; Hypothalamus- Oxt, Cdhr1, Col23a1, Dgkk, Dkk3, Cck, Ptpro;)   
403 showed overlap with literature available on T3 responsive genes in primary cultured neurons  
404 (16,17). Moreover, we observed persistent TTR expression change right from peripubertal  
405 age and perturbation of TH action in developing brain rather than adult stage have been  
406 considered as critical determinants of multiple neurological deficits (18). Finally, we  
407 observed TTR protein changes in PFC endothelial cells and hypothalamic specialized glial  
408 cells known as tanycytes, both of which are involved in uptake of blood borne substances into  
409 brain (19,20). This clearly indicated that transport associated functions of TTR might be  
410 hindered in our experimental paradigm. It is important mentioning here that we show TTR  
411 expression in these cells for the first time. Earlier studies report TTR synthesis in choroid  
412 plexus epithelial cells of the brain until recently it was identified in neurons (21,22) and  
413 astrocytes indicating wide expression of the protein in CNS.

414 In clinical settings, thyroid hormone abnormalities are diagnosed by serum parameters.  
415 However, we show that alterations in TTR gene expression paralleled perturbation in T4 and  
416 T3 content in brain tissues of hypothalamus and PFC without affecting the circulating levels  
417 of the hormone. Determining the effective concentration of T4 and T3 in brain tissues is  
418 difficult owing to multiple factors driving their synthesis, transport across blood-brain and  
419 blood-CSF barrier, intracellular distribution and activation/inactivation (23,24). Therefore  
420 brain specific alterations in TH intrigued us to explore factors besides TTR including  
421 transporters Mct8, Oatp1c1 and enzyme Dio2 that determine the local TH availability in brain  
422 (25, 26) .

423 We noted significant downregulation of Mct8 and Oatp1c1 mRNA in hypothalamus of PPS  
424 induced violent males that corresponded well with reduced hypothalamic T4 and T3 content.  
425 Previously, it was reported that mutation in thyroid transporter MCT8 gene or decrease in its  
426 expression hindered intracellular T3 distribution and neuro-glia communication eventually  
427 leading to neurological ailments like multiple sclerosis (27). Also, Mct8 knockout mice  
428 showed pronounced deficiency in brain T3 content and was region specific particularly  
429 hypothalamus but not in other areas (28)

430 Mct8 deficiency in rodents is considered to be compensated by T4 transport through Oatp1c1.  
431 Oatp1c1 was also reduced in our model system suggesting significant local hypothyroidism  
432 in hypothalamus owing to lack of both the transporters (25, 29). In particular, tissues such as  
433 brain that depend only on these transporters for TH uptake and distribution, become  
434 hypothyroid upon their deficiency whereas other tissues including liver and kidney can still  
435 maintain levels of T3 (30).

436 Dio2 levels showed subtle increase in hypothalamus of PPS induced violent males. In brain,  
437 T3 is derived partly from circulation and is also formed locally by Dio2 mediated 5'-  
438 deiodination of T4. Dio2 action is integral to ascertain optimal intracellular concentrations of  
439 T3 (31). Therefore, Dio2 increase is suggested to be a compensatory response to deficiency  
440 of both Mct8 and Oatp1c1 and maintain TH levels (32). Dio2 is known to be negatively  
441 regulated by TH and was increased upon hypothyroidism in aging rodent brain (33). This  
442 literature information indicated that DIO2 increase in hypothalamus in our model system  
443 strongly suggests reduction in local TH availability.

444 Any change in local TH status of brain has a direct influence on expression of TH responsive genes.  
445 T4 and T3 action initiates with formation of ligand-receptor complexes with TH nuclear  
446 receptors (TRs) which in turn binds to TH response element (TRE) on the promoter of target  
447 genes. A broad spectrum of TH responsive genes are critical for plethora of TH action in  
448 varied cellular processes such as cell proliferation, differentiation, metabolism and  
449 homeostasis (34,35). TH deficiency during postnatal brain development causes irreversible  
450 neurological manifestations through target gene expression changes (36).

451 Nrgn is one such brain specific TH responsive gene that was also amongst the top ranking  
452 differentially expressed gene in our transcriptome data containing TRE elements in promoter  
453 and its transcription is dependent on TH in brain (37,38). Nrgn regulates synaptic plasticity by  
454 activating calmodulin kinase II (CaMKII) protein and spine density. We observed significant

455 reduction in Nrgn transcript and protein levels in concordance with hypothalamic decrease in  
456 T4 and T3 levels. Another top ranking gene of our transcriptome data, Trh known to be  
457 negatively regulated by T3 was robustly upregulated in hypothalamus of violent males.  
458 Overall these findings implicated the role of reduced local thyroid hormone availability in  
459 hypothalamus in PPS induced violent aggression

460 We further strengthened our hypothesis by employing drug induced brain region targeted TH  
461 manipulation approach and assessment of behavioural consequences. As anticipated,  
462 hypothalamic administration of antithyroid drug MMI impaired local TH signaling and  
463 produced violent phenotype in normal unstressed male mice. MMI administration in  
464 hypothalamus drastically downregulated levels of TH transporters Mct8 and Oatp1c1 and  
465 increased Dio2 mRNA and DIO2 enzyme. T3 regulated genes also showed significant  
466 alteration in hypothalamus of MMI treated animals. Earlier reports showed that systemic  
467 MMI treatment reduced Mct8 mRNA, increased Trh and Dio2 mRNA in hypothalamus of  
468 rats (39). Cumulative all these data pointed towards effect of MMI on reduced local T3  
469 availability as also supported by earlier literature (25, 29, 39).

470 Until now we found a strong link between reduced local TH availability in hypothalamus and  
471 emergence of violent phenotype but whether it was mediated by Ttr or was independently  
472 regulated was not clear. We showed that intra-hypothalamic Ttr gene knockdown led to  
473 similar reduction in T3 availability, decrease in Mct8 and Oatp1c1, increase in Dio2 and  
474 alteration in expression of TH target genes as found in our earlier experiments. Besides Trh  
475 and Nrgn, Ttr silencing also reduced hairless (Hr), a universal TH responsive gene that is  
476 studied to monitor the local TH status in brain, expression (40). Therefore, we included Hr  
477 mRNA expression analysis in our study. Ttr gene ablation also evoked violent aggression in  
478 unstressed males to a similar extent to that of PPS induced males. These data clearly  
479 indicated that behavioural and molecular consequences in our experimental regime was  
480 downstream of Ttr, though detailed studies are required to delineate the precise mechanism of  
481 action of Ttr in hypothalamic cells.

482 Interestingly, TTR showed expression changes in both hypothalamus and PFC whereas  
483 violent behavior was triggered only by hypothalamic TTR knockdown or T4 depletion by  
484 methimazole. T4 increase by levothyroxine in PFC did not produce any behavioral changes.  
485 It is likely, that TTR mediated thyroxine reduction in hypothalamus have direct causal role in  
486 violence and consequently PFC endothelial cells express more TTR to uptake hormone and  
487 alleviate the deficiencies. Interestingly, we did not observe significant change in other

488 transporters Mct8 and Oatp1c1 in PFC further indicating that TTR mediated TH uptake in  
489 PFC might result in the compensatory increase of T4 and T3 in response to hypothalamic  
490 reduced TH availability. We explored intergenerational inheritance of PPS induced violent  
491 behavior and observed paternal transmission of behavior in F1 males with concomitant  
492 reduction in, hypothalamic TTR and Nrgn expression and T3 availability. Previous studies  
493 suggest that thyroid hormone changes in neonatal brain can elicit neuroendocrine  
494 abnormalities in their F1 progenies. Also, developmental exposure of thyroxine disrupting  
495 chemicals can affect gene expression and behavior in later generations (41). Further,  
496 mechanistic investigation revealed lasting methylation mark in TTR promoter which was  
497 inherited in F1 generation. DNA methylation plays crucial role in the inheritance of traumatic  
498 memories (42,43). Therefore, we speculate that epigenetic inheritance at the TTR methylation  
499 locus controls long-term programming of the hypothalamic-thyroid axis which in turn  
500 modulates thyroid hormone availability and function throughout life and in subsequent  
501 generations. Future epigenetic manipulation at TTR locus during PPS can shed light on life-  
502 long vulnerability to violence and its inheritance.

503 In conclusion, we provide molecular evidence for emergence, gender vulnerability and  
504 inheritance of post traumatic violent behavior. We delineate novel role of brain TTR-thyroid  
505 signaling in manifestation of early life trauma induced violence and its intergenerational  
506 inheritance that could be mediated at least in part by epigenetic mechanisms. Brain TTR-  
507 thyroid signaling can also serve as valid molecular predictors as well as intervention targets  
508 in violence. Our findings have inherent limitations of investigations in animal models and  
509 therefore further studies are warranted in relevant human cohort to establish role of TTR-  
510 thyroid pathway in violence and criminality. Our work also provides resource for  
511 investigating sexual dimorphism in behavioral disorders and deciphering susceptibility as  
512 well as protective pathways.

513

## 514 **Materials and Methods**

### 515 *Animals*

516 All experimental procedures involving live animals were approved by the animal ethical  
517 committee of CSIR-Institute of Genomics and Integrative Biology (IGIB) and followed  
518 appropriate guidelines for live animal use in research. Male and female offspring of Balb/c  
519 mice bred in the animal house of CSIR-IGIB were used for the study. They were kept at

520 24±2°C on a 12h light/dark cycle with ad libitum access to food and water. Animal handling  
521 and experiments were conducted in accordance with the institutional guidelines.

522

### 523 ***PPS stress procedure***

524 Male and female mice were exposed to unpredictable fear inducing stressors of synthetic fox  
525 odor (trimethylthiazoline) and elevated platform during the peripuberty period of postnatal  
526 day (P) 28 to P42. Briefly, P28 male and female offspring were exposed to an open-field for  
527 10 minutes for acclimatization in a novel environment. Thereafter, one group of mice were  
528 exposed to 9 µl of fox odor (Sigma) soaked cloth kept in a filter top plastic cage and elevated  
529 platform (96 cm above ground) for 7 random days (P28, P29, P30, P34, P36, P40 and P42)  
530 across P28 to P42. Stressors were applied singly or in combination in variable schedule so  
531 that the animals do not learn and get suddenly traumatized. The duration of stress session was  
532 25 minutes following which mice were kept separated for 15 minutes before being housed  
533 together. Control animals were handled on the days in which their counterparts were exposed  
534 to PPS. The videos of stress session were captured and total time immobile and freezing  
535 behavior was analyzed using ANY MAZE version 5.1 software (Stoelting Co, USA).

536

### 537 ***Resident intruder (RI) paradigm***

538 Control and PPS exposed mice of both sexes were assessed for aggression in their adulthood  
539 (P90) using the conventional RI paradigm. The test was performed as described in our  
540 previous report (7). The resident was exposed in its home cage to various category of  
541 intruders including a smaller and unfamiliar (10% less body weight) size, larger size (10%  
542 more body weight), anesthetized, opposite sex and intruder of different strain for 10 minutes  
543 for 7 consecutive days. Each day the resident was introduced to a different intruder in a latin  
544 square design. The behavioral parameters including clinch attack, move towards, social  
545 exploration, ano-genital sniffing, rearing, lateral threat, upright posture, keep down, chase,  
546 non-social explore and rest or inactivity were quantified in terms of percentage (duration) of  
547 the total observation time. Attack latency or the time between introduction of the intruder and  
548 first clinch attack was also determined. The total duration of the clinch attack, offensive  
549 upright, keeping down and lateral threat were considered as the measure of total offensive  
550 behavior. Social exploration behavior included the sum of social explore, auto and social  
551 grooming and ano-genital sniffing. Behavioural screening of animals into non-aggressive,  
552 hyper-aggressive and violent was done based on conventional parameters as published in  
553 earlier reports (12, 44)

554

### 555 ***RNA-sequencing***

556 RNA was isolated from hypothalamus and PFC of male and female mice using Trizol  
557 reagent. Approximately, 1µg of RNA was taken per sample and RNA sequencing libraries  
558 were made using TruSeq v2 Library Prep Kit as per manufacturer's protocol. Briefly, the  
559 RNA was polyA selected using OligodT magnetic beads followed by shearing into 200-500  
560 bp fragments. This sheared RNA was then used to generate cDNA. The cDNA was end-  
561 repaired to blunt ends. These blunt ends were then A-tailed i.e. an "A" overhang was added  
562 so as to ligate the adapters in the next step. The adapter-ligated cDNA was then amplified by  
563 PCR and purified by AMPure XP beads. The prepared library was quantified using Qubit  
564 Fluorometer, and validated for quality on High Sensitivity Bioanalyzer Chip (Agilent) and  
565 sequenced on Illumina HiSeq 2500. The FASTQ sequencing reads were adapter-trimmed  
566 along with a minimum length cut-off of 50 bases using Prinseq-lite. The reads were aligned  
567 to mouse genome assembly using TopHat (v.2.0.11) followed by reference-based assembly  
568 using Cufflinks (v.2.2.1). Then differentially expressing transcripts were identified using  
569 Cuffdiff (v.2.2.1).

570

### 571 ***RT-PCR***

572 Total RNA was isolated from hypothalamus and PFC of mice and 2 µg of RNA from each  
573 group was reverse transcribed to cDNA synthesis. RT-PCR was carried out using SYBR  
574 Green master mix for detection in Light cycler LC 480 (Roche). All primers used for qRT-  
575 PCR are given in Supplementary Table S1. The endogenous control GAPDH was used to  
576 normalize quantification of the mRNA target.

577

### 578 ***Immunoblotting***

579 Cytosolic protein lysates (40 µg) prepared from mouse hypothalamus and PFC were resolved  
580 on to 10% SDS PAGE, transferred to PVDF membrane and used for immunoblotting using  
581 conventional method. The primary antibodies {anti-TTR rabbit polyclonal, anti-Nrgn rabbit  
582 polyclonal; anti-GAPDH mouse monoclonal} and secondary antibodies {anti-rabbit IgG HRP  
583 (Cell Signaling Technology, 7074P2) and anti-mouse IgG HRP (Cell Signaling Technology,  
584 7076P2)} were used at adequate dilutions.

585

### 586 ***Immunohistochemistry***



587 Mice were anaesthetized with thiopentone (40 mg/kg) and perfused with cold 4%  
588 paraformaldehyde in PBS. Brains were removed, post-fixed, cryoprotected in PBS + 15%  
589 sucrose for 2–3 hours followed by immersion in PBS + 30% sucrose for 24 h, and then  
590 sectioned coronally (7  $\mu$ m) on a cryotome. Free-floating sections were permeabilized with  
591 blocking buffer (PBS + 3% normal donkey serum, 0.3% Triton X-100) for 2 hours and then  
592 incubated with TTR primary antibody overnight at 4°C. Slices were then washed 4×15 min  
593 with PBS, incubated with corresponding secondary antibodies for 2 hours, washed 4 × 15  
594 min with PBS, mounted on microscope slides followed by counterstaining with DAPI and  
595 photomicrographs were captured by FLoid fluorescence microscope.

596

### 597 *Thyroid hormone measurement*

598 Mouse blood samples were collected from heart to test serum levels of total  
599 tetraiodothyroxine (T4) and total tri-iodothyroxine (T3). Thyroid hormone content in brain  
600 regions was determined by dissecting hypothalamus and PFC and individually homogenizing  
601 them in artificial cerebral spinal fluid by the ratio of 1  $\mu$ g/4  $\mu$ l (brain tissues/ACSF) and  
602 centrifuged at 14,000 rpm for 15 min at 4°C. The resulting supernatant was collected and  
603 used for ELISA based determination of total T4 and T3 (EliKine™ Thyroxine (T4) ELISA  
604 Kit KET007 and EliKine™ Triiodothyronine (T3) ELISA Kit KET006).

605

### 606 *Deiodinase 2 (DIO2) measurement*

607 We performed an in vitro quantitative measurement of DIO2 in mouse brain tissue  
608 (hypothalamus and PFC) homogenates using a sandwich enzyme immunoassay kit (Reddot  
609 Biotech INC., Mouse Deiodinase, Iodothyronine, Type II (DIO2)ELISA Kit RDR-DIO2-  
610 Mu). Briefly, mouse hypothalamus and PFC tissues were isolated from control and  
611 experimental groups, homogenized in 1XPBS. The resulting suspension was subjected to 2  
612 freeze/thaw cycles to break the cell membranes and centrifuged for 5 minutes at 5000 × g.  
613 The supernatant was removed and used for DIO2 ELISA assay as per manufacturer's  
614 instructions. The concentration of DIO2 was measured spectrophotometrically using a  
615 microplate reader at a wavelength of 450 nm.

616

### 617 *Stereotaxic surgeries and gene manipulation*

618 Mice were anesthetized with 40 mg/kg BW thiopentone i.p. and positioned on a stereotaxic  
619 frame. Methimazole and levothyroxine (1  $\mu$ g/ $\mu$ l, 1  $\mu$ l/side) were bilaterally administered into  
620 the hypothalamus and PFC respectively. The specific coordinates for injection were relative

621 to bregma (mediolateral, dorsoventral, and rostrocaudal axes: PFC =  $\pm$  0.35,  $-2.1$ ,  $+2.2$  mm;  
622 hypothalamus =  $\pm$  0.5,  $-1.5$ ,  $+5.8$  mm). For brain targeted gene manipulation TTR esiRNA  
623 (esiRNA targeting mouse Ttr- EMU030721, Sigma Aldrich)–jetPEI complex a was infused  
624 into hypothalamus and PFC. Injection rate for all the surgeries, was kept at 100 nl/min and  
625 the system was left in place for an additional 1 min and then gently withdrawn. Mice were  
626 allowed to recover individually over heating pads until they recovered from anesthesia and  
627 thereafter returned to their home cages. RI test for aggression was performed 48h after  
628 surgery followed by molecular experiments after an additional 24 h.

629

### 630 ***Methylated DNA immunoprecipitation***

631 DNA methylation was analyzed at the promoter region of Ttr by methylated DNA  
632 immunoprecipitation (MeDIP) method as mentioned earlier (45,46). Briefly, 4  $\mu$ g of  
633 sonicated DNA (DNA fragment size ranging from 300 to 1000 bp) isolated from  
634 hypothalamus and PFC of F0 and F1 male mice was diluted in immunoprecipitation buffer  
635 and incubated with 2  $\mu$ g 5-methyl cytosine antibody (A-1014; Epigentek) at 4°C overnight.  
636 Mouse IgG Isotype control antibody (02-6502, Thermo Fisher Scientific) was used for mock  
637 IP. Next day, 50  $\mu$ L of Protein A-dynabeads was added and incubated at 4°C for 2h with  
638 rotation. Thereafter, it was centrifuged at 3500xg at 4°C for 10 min and the supernatant was  
639 removed carefully. After washing the pellet, the immune complex was eluted, DNA was  
640 purified and dissolved in TE buffer. Using eluted DNA as template, Ttr proximal promoter -  
641 184 to -33 bp from TSS) was amplified with specific primers (Supplementary Table 1)  
642 generating a 151 bp product.

643

### 644 ***Statistical analyses***

645 In order to analyze RT-PCR data, the  $2^{-\Delta\Delta Ct}$  value was used to calculate relative fold  
646 change in mRNA expression and plotted as histograms. For immunoblot analysis, the signal  
647 intensity (Integrated Density Value, IDV) of TTR and Nrgn bands was measured by spot  
648 densitometry tool of AlphaEaseFC software (Alpha Innotech Corp, San Jose, CA, USA),  
649 normalized against the IDV of internal control GAPDH and histogram was plotted as relative  
650 density value. For MeDIP analysis, results were represented as fold enrichment normalized to  
651 IgG control. Histograms were represented as mean of the data (+SD) and statistical  
652 significance was calculated by Student's unpaired two tailed t-test.

653



654 **Acknowledgments:** We acknowledge the animal house facility of CSIR-IGIB, New Delhi,  
655 India. We thank Ashish Kumar (Centre for Biomedical Engineering, IIT Delhi, India) for  
656 assistance in stereotaxy experiments. **Funding:** This work was supported by grants from  
657 Department of Science and Technology, Govt of India (DST/INSPIRE/04/2014/  
658 002261/GAP0125), Department of Biotechnology, Govt of India (GAP0197) and Indian  
659 Council of Medical Research (IR-594/2019/RS). **Author contributions:** A.K. conceived idea  
660 of the project with input from B.P. A.K. and R.R designed the experiments and interpreted  
661 the data. A.K., R.R., A.B., M.P., performed the behavioral, RNA sequencing and other  
662 molecular experiments. A.R. performed the stereotaxy surgeries with input from S.J. A.K.  
663 wrote the manuscript with input from B.P.

664 **Competing interests:** The authors declare no competing interests, financial or otherwise.

665

## 666 **References**

- 667 1. N.E. Anderson, K.A. Kiehl, Psychopathy and aggression: when paralimbic  
668 dysfunction leads to violence. *Curr Top Behav Neurosci.* **17**,369-393 (2014). DOI:  
669 10.1007/7854\_2013\_257
- 670 2. S. Neves, J. Tudela, Aggression and Violence- “a journey through the human brain,  
671 *Eur Psych.* **30**,1243 (2015). doi.org/10.1016/S0924-9338(15)30976-7
- 672 3. R. Waltes, A.G. Chiochetti, C.M. Freitag, The neurobiological basis of human  
673 aggression: A review on genetic and epigenetic mechanisms. *Am J Med Genet B*  
674 *Neuropsychiatr Genet.* **171**,650-675 (2016). DOI: 10.1002/ajmg.b.32388
- 675 4. A Bacq, S Astori, E Gebara, W Tang, BA Silva, J Sanchez-Mut, J Grosse, I Guillot de  
676 Suduiraut, O Zanoletti, C Maclachlan, GW Knott, J Gräff, C Sandi.. Amygdala  
677 GluN2B-NMDAR dysfunction is critical in abnormal aggression of  
678 neurodevelopmental origin induced by St8sia2 deficiency. *Mol Psychiatry.* **25**, 2144–  
679 2161(2020) DOI: 10.1038/s41380-018-0132-3
- 680 5. S.F. de Boer, Animal models of excessive aggression: implications for human  
681 aggression and violence. *Curr Opin Psychol.* **19**,81-87(2018). DOI:  
682 10.1016/j.copsyc.2017.04.006
- 683 6. S. Tzanoulinou, O. Riccio , M.W. de Boer , C. Sandi, Peripubertal stress-induced  
684 behavioral changes are associated with altered expression of genes involved in

- 685           excitation and inhibition in the amygdala. *Transl. Psychiatry*. **4**, e410 (2014). DOI:  
686           10.1038/tp.2014.54
- 687 7.       A. Konar, M. Rastogi, A. Bhambri, Brain region specific methylation and Sirt1  
688       binding changes in MAOA promoter is associated with sexual dimorphism in early  
689       life stress induced aggressive behavior. *Neurochem Int*. **129**,104510 (2019). DOI:  
690       10.1016/j.neuint.2019.104510
- 691 8.       D. Lin, M.P. Boyle, P. Dollar, H. Lee, E.S. Lein, P. Perona, D.J. Anderson. Functional  
692       identification of an aggression locus in the mouse hypothalamus. *Nature*. **470**,221-226  
693       (2011). doi: 10.1038/nature09736.
- 694 9.       A.L. Falkner, L. Grosebeck, T.J. Davidson, K. Deisseroth, D. Lin. Hypothalamic  
695       control of male aggression-seeking behavior. *Nat Neurosci*. **19**,596-604 (2016).
- 696 10.      O. Choy, A. Raine, R.H. Hamilton, Stimulation of the Prefrontal Cortex Reduces  
697      Intentions to Commit Aggression: A Randomized, Double-Blind, Placebo-Controlled,  
698      Stratified, Parallel-Group Trial. *J Neurosci*. **38**,6505-6512 (2018). DOI:  
699      10.1523/JNEUROSCI.3317-17.2018
- 700 11.      L. Biro, E. Sipos, B. Bruzsik, et al. Task Division within the Prefrontal Cortex:  
701      Distinct Neuron Populations Selectively Control Different Aspects of Aggressive  
702      Behavior via the Hypothalamus. *J Neurosci*. **38**,4065-4075(2018). DOI:  
703      10.1523/JNEUROSCI.3234-17.2018
- 704 12.      J.M. Koolhaas, C.M. Coppens, S.F. de Boer, B. Buwalda, P. Meerlo, P.J.  
705      Timmermans, The resident-intruder paradigm: a standardized test for aggression,  
706      violence and social stress. *J Vis Exp*. e4367 (2013). doi: 10.3791/4367.
- 707 13.      B. Alshehri, D.G.D. Souza, J.Y. Lee, S. Petratos, S.J. Richardson, The diversity of  
708      mechanisms influenced by transthyretin in neurobiology: development, disease and  
709      endocrine disruption. *J Neuroendocrinol*. **27**,303-323 (2015). DOI: 10.1111/jne.12271
- 710 14.      A.F. Nunes, M.J. Saraiva, M.M Sousa, Transthyretin knockouts are a new mouse  
711      model for increased neuropeptide Y. *FASEB J*. **20**,166-168 (2006). DOI:  
712      10.1096/fj.05-4106fje
- 713 15.      J.C. Sousa, C. Grandela, J. Fernández-Ruiz, et al. Transthyretin is involved in  
714      depression-like behaviour and exploratory activity. *J Neurochem*. **88**,1052-  
715      1058(2004). DOI: 10.1046/j.1471-4159.2003.02309.x

- 716 16. P. Gil-Ibáñez, J. Bernal, B. Morte, Thyroid hormone regulation of gene expression in  
717 primary cerebrocortical cells: role of thyroid hormone receptor subtypes and  
718 interactions with retinoic acid and glucocorticoids. *PLoS One*. **9**,e91692 (2014). DOI:  
719 10.1371/journal.pone.0091692
- 720 17. S. Richard, F. Flamant, Regulation of T3 Availability in the Developing Brain: The  
721 Mouse Genetics Contribution. *Front Endocrinol (Lausanne)*. **9**,265 (2018). DOI:  
722 10.3389/fendo.2018.00265
- 723 18. L. Préau, J.B. Fini, G. Morvan-Dubois, B. Demeneix, Thyroid hormone signaling  
724 during early neurogenesis and its significance as a vulnerable window for endocrine  
725 disruption. *Biochim Biophys Acta*. **1849**,112-121 (2015). DOI:  
726 10.1016/j.bbagr.2014.06.015
- 727 19. V.M. Pulgar, Transcytosis to Cross the Blood Brain Barrier, New Advancements and  
728 Challenges. *Front Neurosci*. **12**,1019(2019). DOI: 10.3389/fnins.2018.01019
- 729 20. T. Goodman, M.K. Hajihosseini, Hypothalamic tanycytes-masters and servants of  
730 metabolic, neuroendocrine, and neurogenic functions. *Front Neurosci*. **9**,387 (2015).  
731 DOI: 10.3389/fnins.2015.00387
- 732 21. X. Li, E. Masliah, N. Reixach, J.N., Buxbaum, Neuronal production of transthyretin  
733 in human and murine Alzheimer's disease: is it protective?. *J Neurosci*. **31**,12483-  
734 12490 (2011). DOI: 10.1523/JNEUROSCI.2417-11.2011
- 735 22. A. Zawiślak, P. Jakimowicz, J.A. McCubrey, D. Rakus, Neuron-derived transthyretin  
736 modulates astrocytic glycolysis in hormone-independent manner. *Oncotarget*.  
737 **8**,106625-106638 (2017). DOI: 10.18632/oncotarget.22542
- 738 23. A.C. Schroeder, M.L. Privalsky, Thyroid hormones, t3 and t4, in the brain. *Front*  
739 *Endocrinol (Lausanne)*. **5**, 40 (2014). DOI: 10.3389/fendo.2014.00040
- 740 24. S. Báñez-López, A. Guadaño-Ferraz, Thyroid Hormone Availability and Action  
741 during Brain Development in Rodents. *Front Cell Neurosci*. **11**,240(2017). DOI:  
742 10.3389/fncel.2017.00240
- 743 25. S. Mayerl, J. Müller, R. Bauer, S. Richert, C.M. Kassmann, V.M. Darras, K. Buder, A.  
744 Boelen, T.J. Visser, H. Heuer, Transporters MCT8 and OATP1C1 maintain murine  
745 brain thyroid hormone homeostasis. *J Clin Invest*. **124**,1987-99 (2014). doi:  
746 10.1172/JCI70324.

- 747 26. G.R. Williams, J.H. Bassett, Deiodinases: the balance of thyroid hormone: local control  
748 of thyroid hormone action: role of type 2 deiodinase. *J Endocrinol.* **209**, 261-272  
749 (2011). doi: 10.1530/JOE-10-0448.
- 750 27. M.J. Kim, S., Petratos, Oligodendroglial Lineage Cells in Thyroid Hormone-Deprived  
751 Conditions. *Stem Cells Int.* **2019**,5496891(2019). DOI: 10.1155/2019/5496891
- 752 28. M. Trajkovic, T.J. Visser, J. Mittag, S. Horn, J. Lukas, V.M. Darras, et al. Abnormal  
753 thyroid hormone metabolism in mice lacking the monocarboxylate transporter 8. *J*  
754 *Clin Invest.* **117**,627–3 (2007).
- 755 29. C. Luongo, L. Butruille, A. Sébillot, K. Le Blay, M. Schwaninger, H. Heuer, B.A.  
756 Demeneix, S. Remaud, Absence of Both Thyroid Hormone Transporters MCT8 and  
757 OATP1C1 Impairs Neural Stem Cell Fate in the Adult Mouse Subventricular Zone.  
758 *Stem Cell Reports.* **16**,337-353 (2021).
- 759 30. A.M. Dumitrescu, S. Refetoff, The syndromes of reduced sensitivity to thyroid  
760 hormone. *Biochim Biophys Acta.* **1830**,3987–4003 (2013)
- 761 31. C. Luongo, M. Dentice, D. Salvatore, Deiodinases and their intricate role in thyroid  
762 hormone homeostasis. *Nat Rev Endocrinol.* **15**,479-488 (2019).
- 763 32. S.Mayerl, M. Schmidt, D. Doycheva, V.M. Darras, S.S. Hüttner, A. Boelen,  
764 T.J.Visser, C. Kaether, H.Heuer, J. von Maltzahn, Thyroid Hormone Transporters  
765 MCT8 and OATP1C1 Control Skeletal Muscle Regeneration. *Stem Cell Reports.*  
766 **10**,1959-1974 (2018). doi: 10.1016/j.stemcr.2018.03.021.
- 767 33. H. Kerp, K. Engels, F. Kramer, D. Doycheva, G. Sebastian Hönes, D. Zwanziger, L.  
768 Christian Moeller, H. Heuer, D. Führer, Age effect on thyroid hormone brain response  
769 in male mice. *Endocrine.*, **66**,596-606 (2019).
- 770 34. A. Pascual, A. Aranda, Thyroid hormone receptors, cell growth and differentiation.  
771 *Biochim Biophys Acta.* **1830**, 3908-3916 (2013). DOI: 10.1016/j.bbagen.2012.03.012
- 772 35. M. Sirakov, S. Skah, J. Nadjar, M. Plateroti., Thyroid hormone's action on  
773 progenitor/stem cell biology: new challenge for a classic hormone?. *Biochim Biophys*  
774 *Acta.* **1830**,3917-3927(2013). DOI: 10.1016/j.bbagen.2012.07.014
- 775 36. J. Vallortigara, S. Alfons, J. Micheau, P. Higuieret, V. Enderlin, T3 administration in  
776 adult hypothyroid mice modulates expression of proteins involved in striatal synaptic

- 777 plasticity and improves motor behavior. *Neurobiol Dis.* **31**,378-385 (2008). DOI:  
778 10.1016/j.nbd.2008.05.015
- 779 37. J.H. Pak, F.L Huang, J. Li, D. Balschun, K.G. Reymann, C. Chiang, H. Westphal,  
780 K.P. Huang, Involvement of neurogranin in the modulation of calcium/calmodulin-  
781 dependent protein kinase II, synaptic plasticity, and spatial learning: a study with  
782 knockout mice. *Proc Natl Acad Sci U S A.* **97**,11232-11237(2000). DOI:  
783 10.1073/pnas.210184697
- 784 38. M. Husson, V. Enderlin, S. Alfos, C. Boucheron, V. Pallet, P. Higuieret, Expression of  
785 neurogranin and neuromodulin is affected in the striatum of vitamin A-deprived rats.  
786 *Brain Res Mol Brain Res.***123**,7-17 (2004). DOI: 10.1016/j.molbrainres.2003.12.012
- 787 39. A. Herwig, G. Campbell, C.D. Mayer, A. Boelen, R.A. Anderson, A.W.Ross, J.G.  
788 Mercer, P. Barrett, A thyroid hormone challenge in hypothyroid rats identifies T3  
789 regulated genes in the hypothalamus and in models with altered energy balance and  
790 glucose homeostasis. *Thyroid.* **24**, 1575-93 (2014).
- 791 40. B. Morte, P. Gil-Ibáñez, J. Bernal, Regulation of Gene Expression by Thyroid  
792 Hormone in Primary Astrocytes: Factors Influencing the Genomic Response.  
793 *Endocrinology.* **159**,2083-2092 (2018).
- 794 41. M.E. Martinez, C.W. Duarte, J.P. Stohn, A. Karaczyn, Z. Wu, V.E. DeMambro, A.  
795 Hernandez, Thyroid hormone influences brain gene expression programs and  
796 behaviors in later generations by altering germ line epigenetic information. *Mol*  
797 *Psychiatry.* **25**,939-950(2020). DOI: 10.1038/s41380-018-0281-4
- 798 42. V. Vukojevic, I.T. Kolassa, M. Fastenrath, L. Gschwind, K. Spalek, A. Milnik, A.  
799 Heck, C. Vogler, S. Wilker, P. Demougin, F. Peter, E. Atucha, A. Stetak, B.  
800 Roozendaal, T. Elbert, A. Papassotiropoulos, D.J. de Quervain, Epigenetic  
801 modification of the glucocorticoid receptor gene is linked to traumatic memory and  
802 post-traumatic stress disorder risk in genocide survivors. *J Neurosci.* **34**,10274-  
803 10284(2014). DOI: 10.1523/JNEUROSCI.1526-14.2014
- 804 43. K. Gulmez Karaca, J. Kupke, D.V.C. Brito, B. Zeuch, C. Thome, D. Weichenhan, P.  
805 Lutsik, C. Plass, A.M.M. Oliveira, Neuronal ensemble-specific DNA methylation  
806 strengthens engram stability. *Nat Commun.* **11**,639(2020). DOI: 10.1038/s41467-020-  
807 14498-4

- 808 44. A. Takahashi, K.A. Miczek, Neurogenetics of aggressive behavior: studies in rodents.  
809 *Curr Top Behav Neurosci.* **17**:3-44 (2014). 45. A. Mukhopadhyay, B.  
810 Deplancke, A.J. Walhout, H.A. Tissenbaum, Chromatinimmuno-precipitation (ChIP)  
811 coupled to detection by quantitative real-time PCR to study transcription factor  
812 binding to DNA in *Caenorhabditis elegans*. *Nat. Protoc.* **3**,698–709. DOI:  
813 10.1038/nprot.2008.38
- 814 46. F. Mohn, M. Weber, D. Schubeler, T.C. Roloff, Methylated DNA immuno-  
815 precipitation (MeDIP). *Methods Mol. Biol.* **507**, 55–64 (2009) DOI: 10.1007/978-1-  
816 59745-522-0\_5
